# Supplementary material for: Effect of recombinant human nerve growth factor eye drops in patients with dry eye: a phase IIa, open label, multiple-dose study
Source: PubMed Central journal article supplement — Br J Ophthalmol. 2019 Apr 3;104(1):127–35. doi: 10.1136/bjophthalmol-2018-312470 (PMC6922013; doi:10.1136/bjophthalmol-2018-312470), 2019-04-03
Supplement: bjophthalmol-2018-312470supp002.pdf [file bjophthalmol-2018-312470supp002.pdf]

## Supplementary file 2

### Definitions of Adverse Events

An adverse event (AE) is defined as any untoward medical occurrence in a patient or clinical trial patient administered a medicinal product, which does not necessarily have a causal relationship with the study treatment (Directive 2001/20/EC). An AE can therefore be any unfavorable and unintended sign (including an abnormal laboratory finding), symptom, or disease temporally associated with the use of a medicinal (investigational) product, whether or not related to the medicinal (investigational) product.

### Non-Serious Adverse Event (SAE)

A non-serious AE is defined as any untoward change in a patient's medical conditions that does not meet serious criteria noted below (e.g., is not fatal, is not life-threatening, does not require hospitalization, does not prolong a current hospitalization, is not disabling, etc.).

### Serious Adverse Event (SAE)

A serious adverse event (SAE) is defined in line with Directive 2001/20/EC as any adverse experience that meets any of the following criteria:

- results in death
- is life-threatening
- requires inpatient hospitalization or prolongation of existing hospitalization
- results in persistent or significant disability/incapacity
- results in a congenital anomaly/birth defect
- is an important medical event

### Serious Unexpected Adverse Event/Reaction Definition

An adverse event/reaction, the nature or severity of which is not consistent with the applicable product information (e.g. investigator's brochure for an unauthorised investigational product).

### Adverse Events of Special Interest (Sight-threatening Events)

The following adverse events are considered to be of special interest and by default shall be reported as SAEs (medically important criteria):

- Adverse Events that caused a decrease in visual acuity of >30 ETDRS letters or > +0.6 LogMAR (compared with the last assessment of visual acuity at the last visit) lasting >1 hour
- Adverse Events that caused a decrease in visual acuity to the level of Light Perception or worse lasting >1 hour
- Adverse Events that required surgical intervention (e.g., conventional surgery, vitreous tap or biopsy with intravitreal injection of anti-infectives, or laser or retinal cryopexy with gas) to prevent permanent loss of sight
- Adverse Events associated with severe intraocular inflammation (i.e., 4+ anterior chamber cell/flare or 4+ vitritis)
- Adverse Events that, in the opinion of the investigator, may require medical intervention to prevent permanent loss of sight.

### Intensity Assessments

For every AE, the intensity (severity) has been assessed. Specifically, the intensity of events has been classified as:

- Mild : Does not interfere with patient's usual function (awareness of symptoms or signs, but easily tolerated [acceptable]).
- Moderate : Interferes to some extent with patient's usual function (enough discomfort to interfere with usual activity [disturbing]).
- Severe: Interferes significantly with patient's usual function (incapacity to work or to do usual activities [unacceptable])
