# Supplementary material for: Effect of recombinant human nerve growth factor eye drops in patients with dry eye: a phase IIa, open label, multiple-dose study
Source: PubMed Central journal article supplement — Br J Ophthalmol. 2019 Apr 3;104(1):127–35. doi: 10.1136/bjophthalmol-2018-312470 (PMC6922013; doi:10.1136/bjophthalmol-2018-312470), 2019-04-03
Supplement: bjophthalmol-2018-312470supp003.pdf [file bjophthalmol-2018-312470supp003.pdf]

**Table 1 Supplementary Materials. Results on efficacy parameters evaluated during the study.**

|                                                                             | <b>Dose<br/>rhNGF<br/>eye drop</b> | <b>Baseline</b><br>(from day-15<br>to day -1) | <b>Day 1</b> | <b>Day 8±1</b>   | <b>Day 29±1</b><br>(end of<br>treatment) | <b>Day 56±4</b><br>(end of<br>follow-up) |
|-----------------------------------------------------------------------------|------------------------------------|-----------------------------------------------|--------------|------------------|------------------------------------------|------------------------------------------|
| <b>Frequency of DED<br/>symptoms (SANDE<br/>scale) (mean±SD)</b>            | 20 µg/ml                           | 55.3±27.3                                     | 47.3±24.2*   | 40.3±23.1*       | 28.4±26.2*                               | 25.2±26.5*                               |
|                                                                             | 4 µg/ml                            | 59.7±29.2                                     | 49.7±22.4    | 36.4±23.8*       | 33.5±26.4*                               | 31.7±26.8*                               |
| <b>Severity of DED<br/>symptoms (SANDE<br/>scale) (mean±SD)</b>             | 20 µg/ml                           | 52.8±23.2                                     | 45.3±23.7    | 41.1±23.1*       | 25.9±26.9*                               | 23.9±28.1*                               |
|                                                                             | 4 µg/ml                            | 60.1±29.6                                     | 50.3±21.6    | 39.1±27.0*       | 31.5±25.5*                               | 31.9±27.9*                               |
| <b>OSDI scale<br/>(mean±SD)</b>                                             | 20 µg/ml                           | 55.52 ±21.81                                  | 50.15±22.37* | 41.19±21.34<br>* | 32.6±16.2*                               | 32.05±21.4<br>2*                         |
|                                                                             | 4 µg/ml                            | 52.48±21.84                                   | 52.26±21.66  | 42.09±23.57<br>* | 35.77±22.82<br>*                         | 37.72±20.1<br>4*                         |
| <b>NEI ocular surface<br/>total score<br/>(mean±SD)</b>                     | 20 µg/ml                           | 13.3±4.9                                      | 11.8±3.5     | 7.4±2.8*         | 3.8±3.1*                                 | 5.5±3.2*                                 |
|                                                                             | 4 µg/ml                            | 12.6±5.1                                      | 12.9±5.4     | 10.4±5.5*        | 7.5±4.8*                                 | 7.7±5.3*                                 |
| <b>NEI cornea total<br/>score (mean±SD)</b>                                 | 20 µg/ml                           | 5.2±2.0                                       | 4.8±2.0      | 2.5±1.6*         | 1.3±2.2*                                 | 1.2±1.6*                                 |
|                                                                             | 4 µg/ml                            | 5.9±2.7                                       | 5.7±2.9      | 4.7±3.5*         | 3.0±3.3*                                 | 3.1±2.9*                                 |
| <b>NEI conjunctiva<br/>total score<br/>(mean±SD)</b>                        | 20 µg/ml                           | 8.1±3.5                                       | 7.0±2.5*     | 4.9±2.2*         | 2.5±1.4*                                 | 4.3±2.0*                                 |
|                                                                             | 4 µg/ml                            | 6.8±2.7                                       | 7.3±3.0      | 5.7±2.6*         | 4.5±2.1*                                 | 4.6±2.9*                                 |
| <b>Cornea sensitivity</b><br>Cochet-Bonnet<br>esthesiometer<br>mm (mean±SD) | 20 µg/ml                           | 5.6±0.91                                      | 5.65±0.54    | 5.63±0.72        | 5.93±0.18                                | 5.88±0.39*                               |
|                                                                             | 4 µg/ml                            | 5.43±1.2                                      | 5.63±0.99    | 5.8±0.44         | 5.79±0.71                                | 5.93±0.18*                               |
| <b>Schirmer test I</b><br>mm/5 minutes<br>(mean±SD)                         | 20 µg/ml                           | 4.1±3.3                                       | 5.4±5.7      | 8.6±9.0*         | 9.4±7.8*                                 | 8.7±10.2*                                |
|                                                                             | 4 µg/ml                            | 5.2±3.7                                       | 6.5±6.7      | 5.9±6.8          | 8.2±6.8                                  | 9.8±8.8*                                 |
| <b>Break-up time</b><br>Seconds (mean±SD)                                   | 20 µg/ml                           | 3.4±2                                         | 4±1.8        | 4.9±2.2*         | 6.0±2.5*                                 | 5.6±2.4*                                 |
|                                                                             | 4 µg/ml                            | 3±2.4                                         | 2.3±2.1      | 2.7±1.7          | 2.5±1.3                                  | 2.7±2.1                                  |

|                                       |          |             |            |            |             |           |
|---------------------------------------|----------|-------------|------------|------------|-------------|-----------|
| <b>Tear osmolarity<br/>(Tear Lab)</b> | 20 µg/ml | 313.6 ±13.7 | 304.6±9.1* | 309.6±11.9 | 308.2±12.3* | 308.8±9.8 |
| mOsm/L<br>(mean±SD)                   | 4 µg/ml  | 313.6 ±16.1 | 313.2±16.8 | 314.4±19.2 | 312.5±12.3  | 318±18.3  |

OSDI: Ocular Surface Disease Index; NEI: National Eye Institute; mm: millimeters

\*p<0.05 Wilcoxon signed-rank test
